# Supplementary material for: Sequential enantiodivergent organocatalysis: reversibility in enantioswitching controlled by a conformationally flexible guanidine/bisthiourea organocatalyst
Source: Royal Society of Chemistry journal article supplement (doi:10.1039/c3ob27479a), 2013-01-01
Supplement: c3ob27479a.pdf [file c3ob27479a.pdf]

Supporting Information for:

***Sequential Enantiodivergent Organocatalysis: Reversibility in Enantioswitching Controlled by Conformationally Flexible Guanidine/Bisthiourea Organocatalyst***

*Yoshihiro Sohtome,<sup>\*a,b</sup> Takahisa Yamaguchi,<sup>a</sup> Shinji Tanaka<sup>a</sup> and Kazuo Nagasawa<sup>\*a</sup>*

a. Department of Biotechnology and Life Science, Faculty of Technology,

Tokyo University of Agriculture and Technology

2-24-16, Naka-cho, Koganei, Tokyo 184-8588, Japan

E-mail: knaga@cc.tuat.ac.jp

b. Present Address: Synthetic Organic Laboratory, Advanced Science Institute, RIKEN, 2-1

Hirosawa, Wako, Saitama 351-0198, Japan.

E-mail: sohtome@riken.jp

**Table of Contents:**

|                                                                                                                                    |       |
|------------------------------------------------------------------------------------------------------------------------------------|-------|
| 1. Instrumentation.....                                                                                                            | S1    |
| 2. Relationships between the <i>ee</i> of ( <i>S,S</i> )- <b>1</b> and that of <b>4aa</b> .....                                    | S2    |
| 3. Relationships between <i>ee</i> of <b>4aa</b> and toluene/acetonitrile content.....                                             | S3    |
| 4. Copies of HPLC chart of ( <i>R</i> )- <b>4aa</b> and ( <i>S</i> )- <b>4ba</b> in the sequential enantiodivergent reactions..... | S4    |
| 5. Synthesis of ( <i>S,S</i> )- <b>1</b> .....                                                                                     | S5–S8 |
| 6. Synthesis of ( <i>S,S</i> )- <b>5</b> .....                                                                                     | S8    |
| 7. References.....                                                                                                                 | S9    |

-----  
**1. Instrumentation**

Flash chromatography was performed using silica gel 60 (spherical, particle size 0.040-0.100 mm; Kanto Co., Inc., Japan). Optical rotations were measured on a JASCO P-2200 polarimeter. <sup>1</sup>H and <sup>13</sup>C NMR spectra were recorded on JEOL EX300 and ECA/ECX400 instruments. Chemical shifts in chloroform-*d*, were reported in the scale relative to chloroform-*d* (7.26 ppm), for <sup>1</sup>H NMR respectively. For <sup>13</sup>C NMR, chemical shifts were reported in the scale relative to chloroform-*d* (77.0 ppm) as an internal reference. Mass spectra were recorded on JEOL JMS-T100LC and JEOL JMA-HX110 spectrometer.

## 2. Relationships between the *ee* of (*S,S*)-1 and that of 4aa

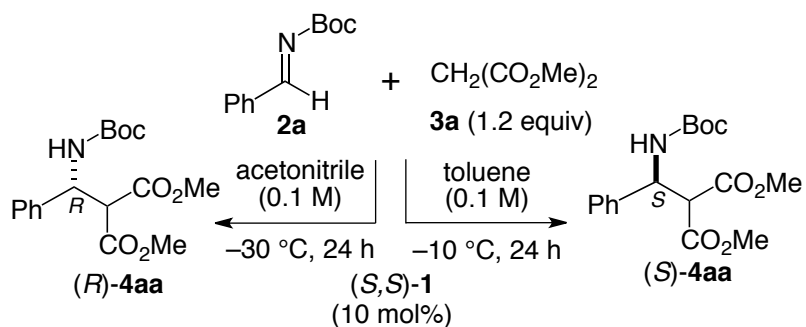

**Table S-1** [a]

| entry | <i>ee</i> of ( <i>S,S</i> )-1 (%) | ( <i>S</i> )-4aa (%) <sup>[b]</sup> |
|-------|-----------------------------------|-------------------------------------|
| 1     | 100                               | 88                                  |
| 2     | 80                                | 73                                  |
| 3     | 60                                | 58                                  |
| 4     | 40                                | 32                                  |
| 5     | 20                                | 16                                  |

**Table S-2** [a]

| entry | <i>ee</i> of ( <i>S,S</i> )-1 (%) | ( <i>S</i> )-4aa (%) <sup>[b]</sup> |
|-------|-----------------------------------|-------------------------------------|
| 1     | 100                               | 90                                  |
| 2     | 80                                | 75                                  |
| 3     | 60                                | 53                                  |
| 4     | 40                                | 38                                  |
| 5     | 20                                | 22                                  |

[a] Reactions were carried out on a 0.1 mmol scale in 1.0 mL of the solvent. [b] Determined by chiral HPLC analysis.<sup>1</sup>

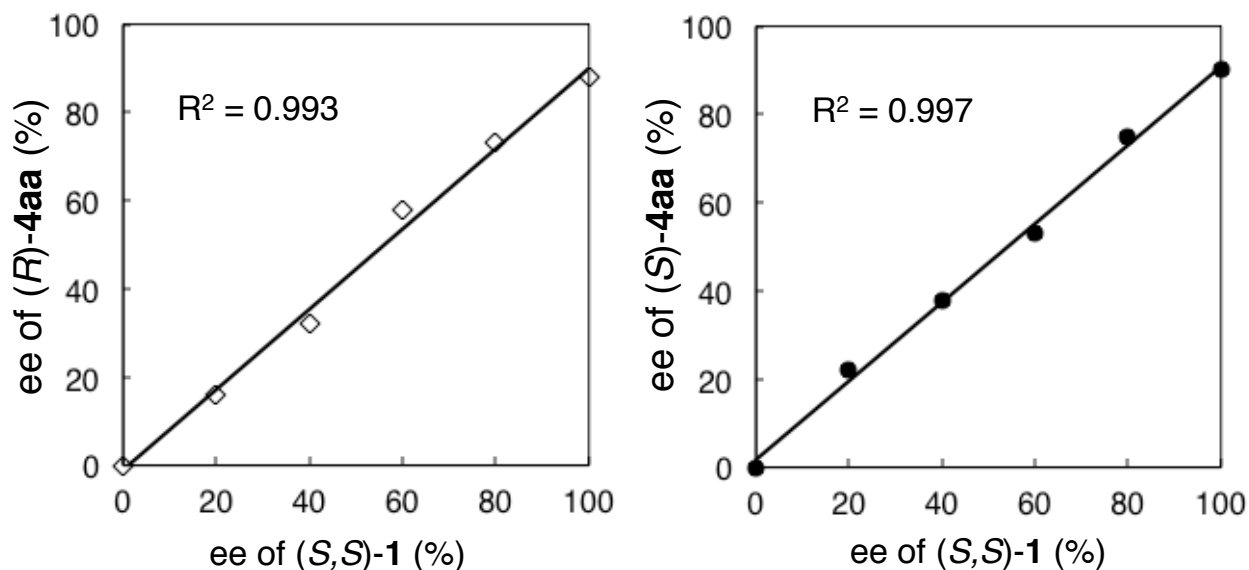

**Figure S-1.**

### 3. Relationships between ee of 4aa and *m*-xylene/acetonitrile content

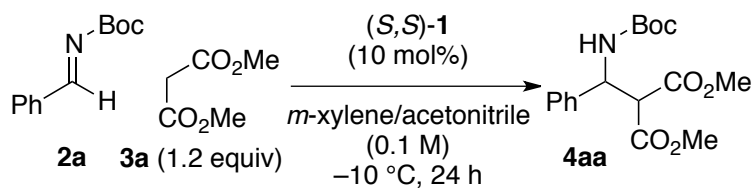

Table S-3<sup>[a]</sup>

| entry | acetonitrile content (%) | <i>ee</i> of ( <i>R</i> )-5a (%) <sup>[b]</sup> |       |       |         | SD  |
|-------|--------------------------|-------------------------------------------------|-------|-------|---------|-----|
|       |                          | run 1                                           | run 2 | run 3 | average |     |
| 1     | 0                        | 89                                              | 90    | 89    | 89      | 0.5 |
| 2     | 10                       | 83                                              | 81    | 79    | 81      | 2   |
| 3     | 20                       | 48                                              | 46    | 44    | 46      | 2   |
| 4     | 50                       | -24                                             | -24   | -20   | -23     | 2.3 |
| 5     | 80                       | -61                                             | -60   | -61   | -61     | 0.6 |
| 6     | 90                       | -67                                             | -70   | -73   | -70     | 3.0 |
| 7     | 100                      | -79                                             | -78   | -79   | -79     | 0.6 |

[a] Reactions were carried out on a 0.1 mmol scale in 1.0 mL of the solvent. [b] Determined by chiral HPLC analysis.<sup>1</sup>

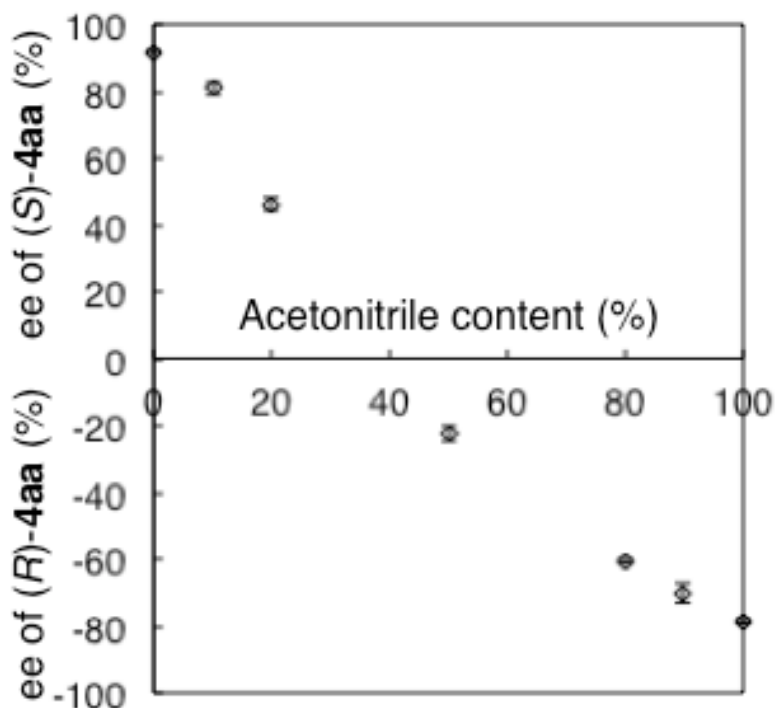

Figure S-2.

## 4. Copies of HPLC chart of (R)-4aa<sup>1,2</sup> and (S)-4ba<sup>1</sup> in the sequential enantiodivergent reactions.

### 4.1. Protocol a)

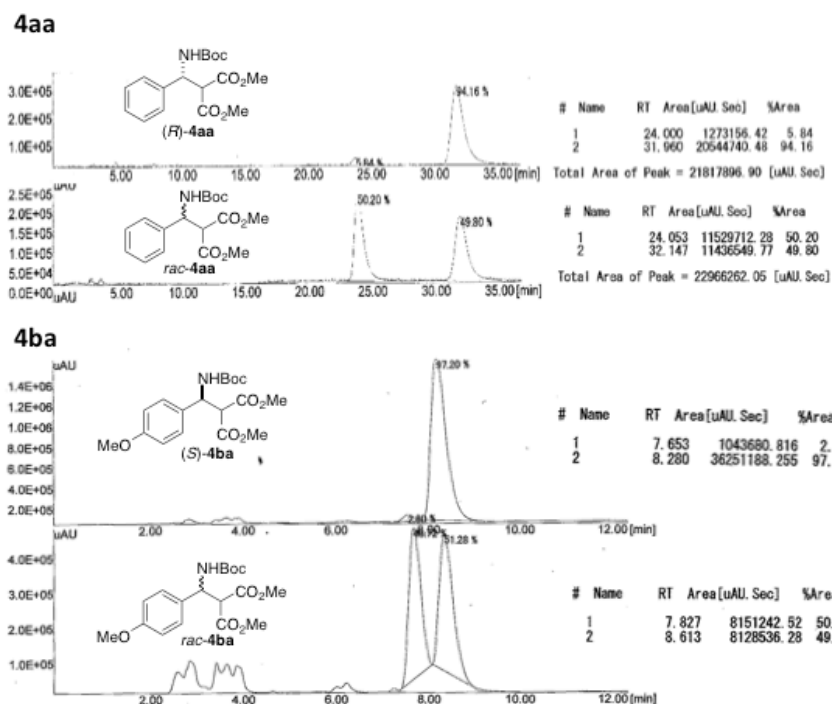

### 4.2. Protocol b)

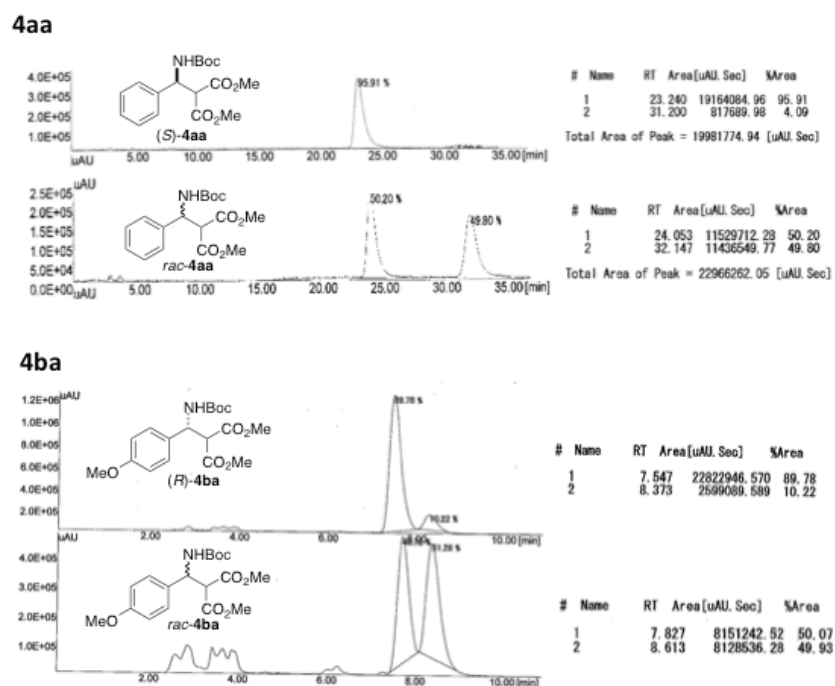

## 5. Synthesis of (*S,S*)-1

(*S,S*)-1 was synthesized according to the previously developed synthetic procedure,<sup>3</sup> as shown in Scheme S-1.

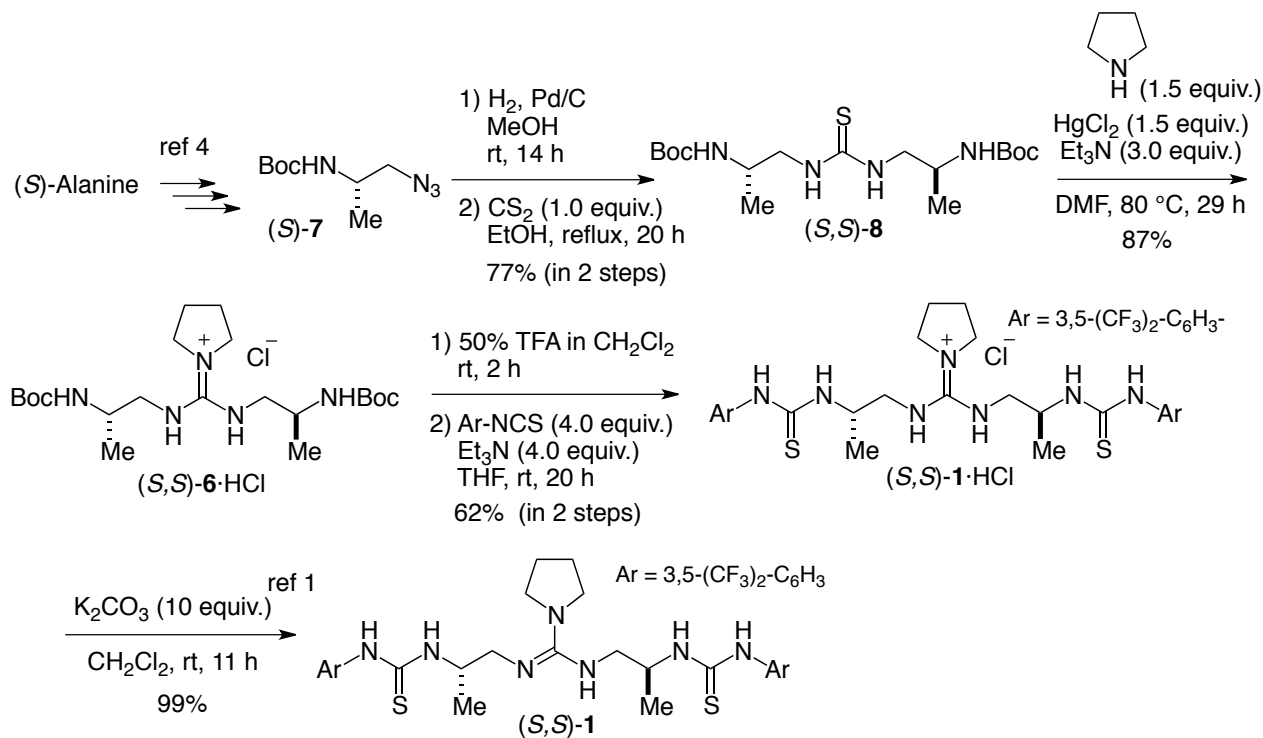

Scheme S-1. Synthesis of (*S,S*)-1

### Typical procedure for preparation of (*S,S*)-8

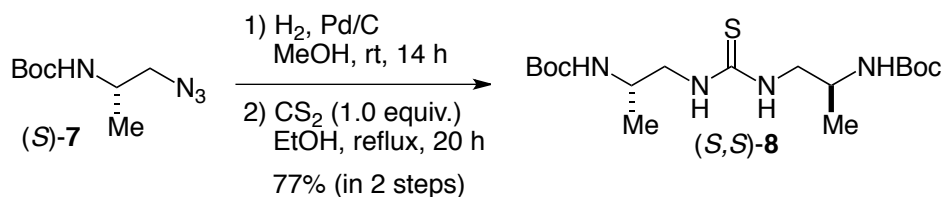

A mixture of azide (*S*)-7 (7.88 g, 39.4 mmol)<sup>4</sup> and Pd/C (10%, 80.0 mg) in MeOH (80 mL) was stirred under 1 atm of hydrogen at room temperature for 14 h. The mixture was filtrated through a pad of Celite, and the filtrate was concentrated under reduced pressure. To a solution of the resulting amine in EtOH (150 mL) was added CS<sub>2</sub> (2.3 mL, 39.4 mmol) at room temperature, and the resulting mixture was heated to reflux and stirred for 20 h. After cooling to room temperature, the reaction mixture was concentrated under reduced pressure and the residue was purified by flash column chromatography on silica gel (Hexane/EtOAc, 1:2) to give thiourea (*S,S*)-8 (5.91 g, 77% in 2steps)

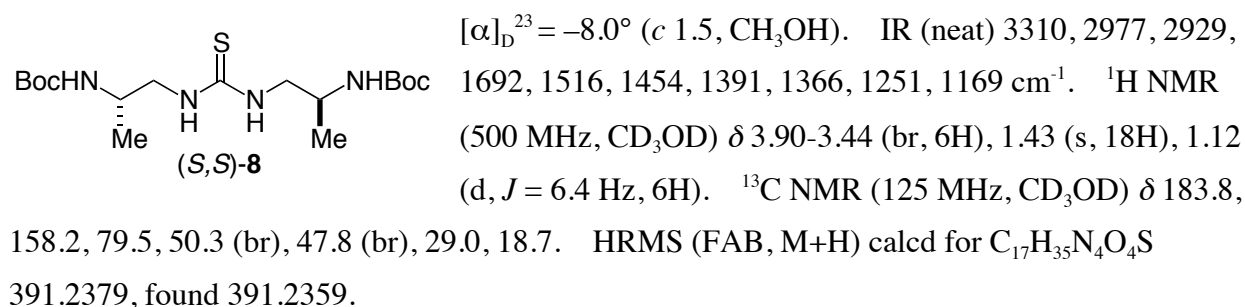

### Typical procedure for preparation of (*S,S*)-6·HCl

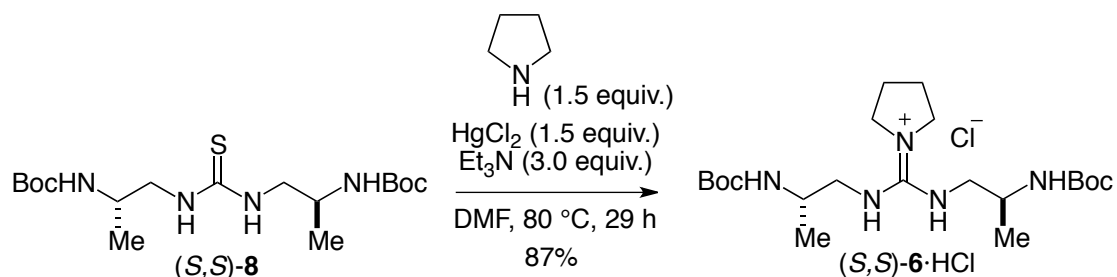

To a mixture of (*S,S*)-8 (2.00 g, 5.12 mmol), pyrrolidine (0.64 mL, 7.68 mmol) and triethylamine (2.16 mL, 15.4 mmol) in DMF (15 mL) was added HgCl<sub>2</sub> (2.09 g, 7.68 mmol) at room temperature, and the resulting mixture was stirred for 29 h at 80 °C. The resulting mixture was diluted with EtOAc, and filtered through a pad of Celite. The filtrate was poured into water. The aqueous layer was extracted with EtOAc (x 3) and the combined organic layer was washed with brine (x 3). The organic layer was dried over MgSO<sub>4</sub>. After removing the solvent under reduced pressure, the residue was purified by flash column chromatography (chloroform/methanol, 25:1 to 5:1) to give (*S,S*)-6·HCl (2.06 g, 87%)

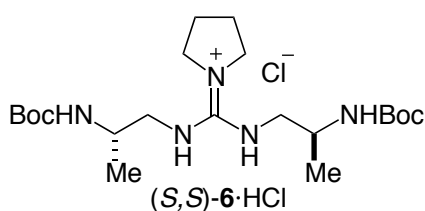

$[\alpha]_D^{14} = -5.0$  ( $c$  1.6,  $\text{CH}_3\text{OH}$ ).  $^1\text{H NMR}$  (400 MHz,  $\text{CDCl}_3$ )  $\delta$  7.62 (br s, 2H), 5.57 (br s, 2H), 3.75 (br, 2H), 3.49 (br, 4H), 3.30, (br, 4H), 1.89 (br, 1H), 1.82 (br, 1H), 1.30 (s, 18H), 1.15 (d,  $J = 4.0$  Hz, 6H).  $^{13}\text{C NMR}$  (100 MHz,  $\text{CDCl}_3$ )  $\delta$  156.3, 156.0, 79.3, 77.2, 49.4, 46.3, 28.1, 25.1, 18.2. HRMS (ESI, M-Cl) calcd for  $\text{C}_{21}\text{H}_{42}\text{N}_5\text{O}_4$  428.3237, found 428.3224.

M-Cl) calcd for  $\text{C}_{21}\text{H}_{42}\text{N}_5\text{O}_4$  428.3237, found 428.3224.

### Typical procedure for preparation of (S,S)-1·HCl

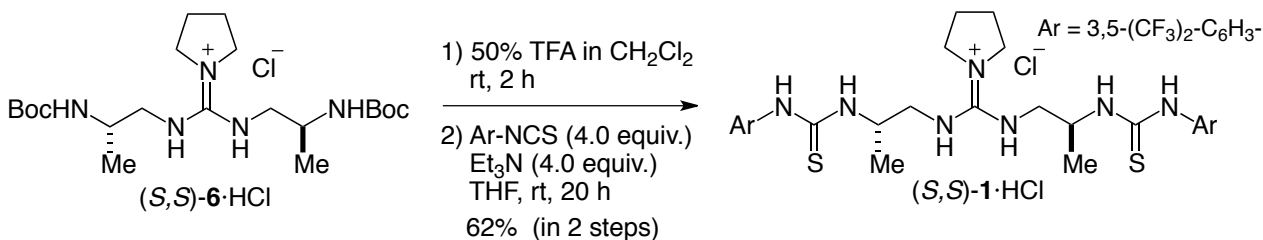

To a solution of (S,S)-6·HCl (315 mg, 0.679 mmol) in  $\text{CH}_2\text{Cl}_2$  (5.0 mL) was added TFA (2.5 mL) at 0 °C. The reaction mixture was stirred at room temperature for 2 h, and the resulting mixture was concentrated under reduced pressure to give the corresponding diamine. To a solution of diamine and triethylamine (0.38 mL, 2.72 mmol) in THF (10 mL) was added 3,5-bis(trifluoromethyl)phenyl isothiocyanate (0.49 mL, 2.72 mmol) and the mixture was stirred at room temperature for 20 h. The reaction mixture was concentrated under reduced pressure and the residue was purified by column chromatography on silica gel ( $\text{CHCl}_3/\text{MeOH}$ , 100/1 to 50:1) to give the bistiourea. The counter anion of the catalyst was exchanged into chloride by treatment with saturated  $\text{NH}_4\text{Cl}$  aq of EtOAc solution of (S,S)-1·HCl (339 mg, 62% in 2 steps).

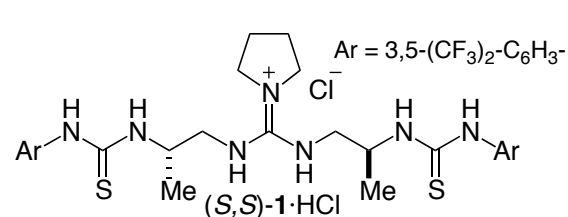

$[\alpha]_D^{25} = -166.7$  ( $c$  1.9,  $\text{CHCl}_3$ ).  $^1\text{H NMR}$  (400 MHz,  $\text{CD}_3\text{OD}$ )  $\delta$  8.22 (s, 4H), 7.62 (s, 2H), 4.86 (br, 2H), 3.53-3.42 (m, 8H), 1.97 (m, 4H), 1.28 (d,  $J = 6.9$  Hz, 6H).  $^{13}\text{C NMR}$  (100 MHz,  $\text{CD}_3\text{OD}$ )  $\delta$  182.8, 157.7, 142.9, 132.6 (q,  $J_{\text{CF}} = 32.5$  Hz), 129.3, 128.7, 124.7

(d,  $J_{\text{CF}} = 271.3$  Hz), 123.8 (br), 120.6, 119.0, 118.0 (br), 50.7, 50.4, 26.4, 18.0. HRMS (ESI, M-Cl) calcd for  $\text{C}_{29}\text{H}_{32}\text{F}_{12}\text{N}_7\text{S}_2$  770.1969, found 770.1945.

### Typical procedure for preparation of (*S,S*)-1<sup>1</sup>

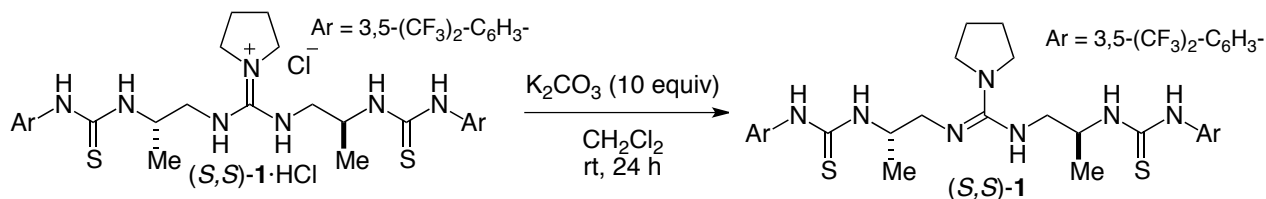

To a solution of (*S,S*)-1a·HCl (71.0 mg, 0.0881 mmol) in CH<sub>2</sub>Cl<sub>2</sub> (2.0 mL) was added K<sub>2</sub>CO<sub>3</sub> (122 mg, 0.881 mmol) and stirred vigorously at room temperature for 11 h. The resulting mixture was diluted with CH<sub>2</sub>Cl<sub>2</sub>, and filtered through a pad of Celite. The filtrates were concentrated *in vacuo* to give (*S,S*)-1 (67.8 mg, 99%). The catalyst was used for the asymmetric reaction without further purification, and was stored under air at room temperature.

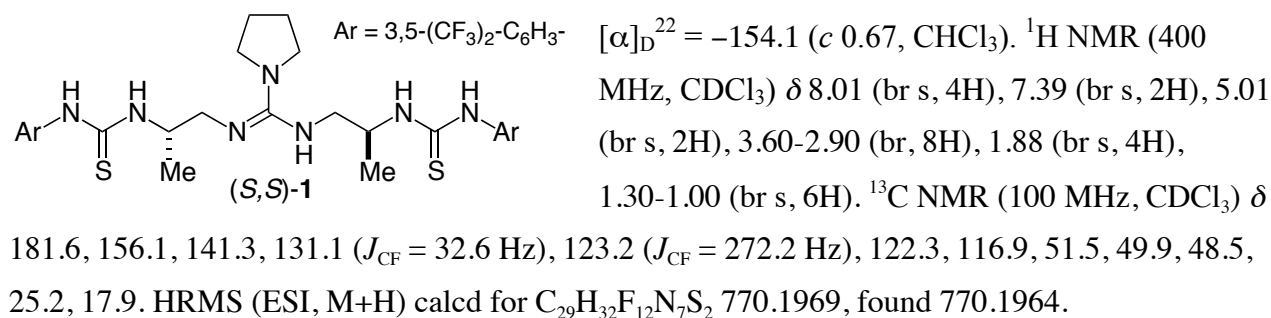

### 6. Synthesis of (*S,S*)-5

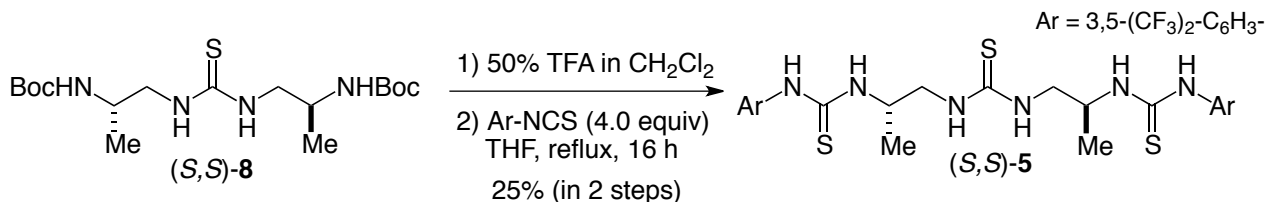

To a solution of (*S,S*)-8 (300 mg, 0.76 mmol) in CH<sub>2</sub>Cl<sub>2</sub> (5.0 mL) was added TFA (2.5 mL) at 0 °C. The reaction mixture was stirred at room temperature for 1 h, and the resulting mixture was concentrated under reduced pressure to give diamine. To a solution of diamine in THF (8 mL) was added 3,5-bis(trifluoromethyl)phenyl isothiocyanate (0.56 mL, 3.04 mmol) and the mixture was stirred under reflux for 16 h. The reaction mixture was concentrated under reduced pressure and the residue was purified by column chromatography on silica gel (CHCl<sub>3</sub>/MeOH, 50/1) to give the (*S,S*)-5 (140 mg, 25% in 2 steps)

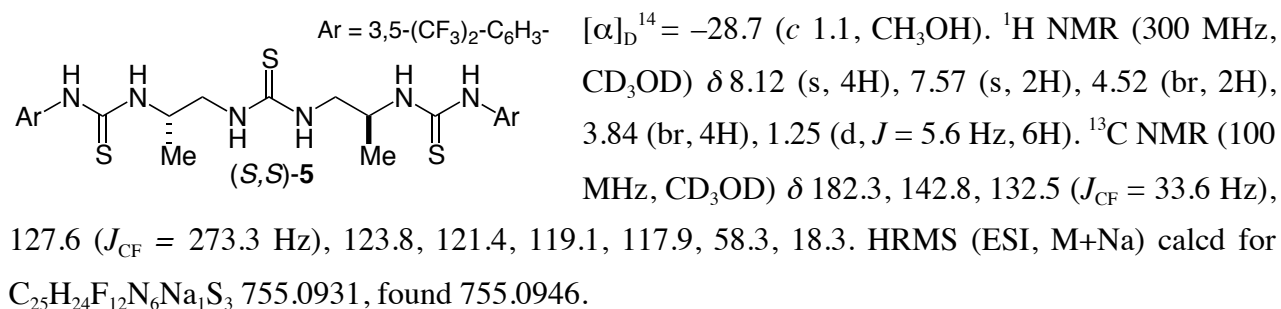



## 7. References

- 1) Y. Sohtome, S. Tanaka, K. Takada, T. Yamaguchi and K. Nagasawa, *Angew. Chem. Int. Ed.*, 2010, **49**, 9254.
- 2) A. L. Tillman, J. Ye and D. J. Dixon, *Chem. Commun.* 2006, 1191.
- 3) Y. Sohtome, Y. Hashimoto, K. Nagasawa, *Adv. Synth. Catal.* 2005, **347**, 1643.
- 4) A recent example, see: A. K. Medda, C. M. Park, A. Jeon, H. Kim, J.-H. Sohn, H.-S. Lee, *Org. Lett.* 2011, **13**, 3486.
